# Supplementary material for: Does internet-accessed STI (e-STI) testing increase testing uptake for chlamydia and other STIs among a young population who have never tested? Secondary analyses of data from a randomised controlled trial
Source: PubMed Central journal article supplement — Sex Transm Infect. 2019 Jun 7;95(8):569–74. doi: 10.1136/sextrans-2019-053992 (PMC6902059; doi:10.1136/sextrans-2019-053992), 2019-06-07
Supplement: sextrans-2019-053992supp001.pdf [file sextrans-2019-053992supp001.pdf]

Additional information on STI testing kits used in the online service

## 1. Assays

| Chlamydia                      | Gonorrhoea                                                                                                               | HIV                                                                                                                           | Syphilis                                                                                                                |
|--------------------------------|--------------------------------------------------------------------------------------------------------------------------|-------------------------------------------------------------------------------------------------------------------------------|-------------------------------------------------------------------------------------------------------------------------|
| BD Viper Platform/<br>BD Assay | BD Viper<br>Platform/ BD<br>Assay<br><br>Positive GC<br>results confirmed<br>using Cepheid<br>GeneXpert (Dual<br>Target) | HIV I and II/p24Ag<br><br>Roche Platform/<br>Roche Assay<br><br>Reactive results<br>confirmed by assays<br>in clinic settings | Syphilis IgG/IgM<br><br>Abbott Architect/Abbott Assay<br><br>Reactive results confirmed by<br>assays in clinic settings |

## 2. Sample collection\*

|                  | Chlamydia and Gonorrhoea                                                          | HIV and Syphilis                               |
|------------------|-----------------------------------------------------------------------------------|------------------------------------------------|
| Women            | Swab for vulvovaginal sample                                                      | Lancet and collection tube for<br>blood sample |
| Heterosexual Men | Container for first-catch urine sample                                            |                                                |
| MSM              | Container for first-catch urine sample<br>Swabs for pharyngeal and rectal samples |                                                |

\*All tests kits included pictorial leaflets with guidance on how to collect the specimens. A video demonstrating blood sample collection available via the SH:24 website.
