# Supplementary material for: Does internet-accessed STI (e-STI) testing increase testing uptake for chlamydia and other STIs among a young population who have never tested? Secondary analyses of data from a randomised controlled trial
Source: PubMed Central journal article supplement — Sex Transm Infect. 2019 Jun 7;95(8):569–74. doi: 10.1136/sextrans-2019-053992 (PMC6902059; doi:10.1136/sextrans-2019-053992), 2019-06-07
Supplement: sextrans-2019-053992supp002.pdf [file sextrans-2019-053992supp002.pdf]

Supplementary Table 1: Characteristics of 'never' and 'ever' testers in the full RCT sample (n=2,063)

|                                       | Never Tested<br>(n=528) | Previously Tested<br>(n=1,535) | P value ( $\chi^2$ ) |
|---------------------------------------|-------------------------|--------------------------------|----------------------|
| <b>Gender</b>                         |                         |                                |                      |
| Female                                | 272 (51.7)              | 941 (61.4)                     | <0.001               |
| Male                                  | 254 (48.3)              | 592 (38.6)                     |                      |
|                                       |                         |                                |                      |
| <b>Age group (years)</b>              |                         |                                |                      |
| 16-19 years                           | 214 (40.5)              | 212 (13.8)                     | <0.001               |
| 20-24 years                           | 206 (39.0)              | 666 (43.4)                     |                      |
| 25-30 years                           | 108 (20.5)              | 657 (42.8)                     |                      |
|                                       |                         |                                |                      |
| <b>Sexual Orientation</b>             |                         |                                |                      |
| MSM                                   | 35 (6.6)                | 227 (14.8)                     | <0.001               |
| Other                                 | 482 (91.3)              | 1296 (84.4)                    |                      |
| Refused                               | 11 (2.1)                | 12 (0.8)                       |                      |
|                                       |                         |                                |                      |
| <b>Partners in the last 12 months</b> |                         |                                |                      |
| 1                                     | 234 (44.3)              | 372 (24.2)                     | <0.001               |
| 2 or more                             | 294 (55.7)              | 1163 (75.8)                    |                      |
|                                       |                         |                                |                      |
| <b>Ethnic Group</b>                   |                         |                                |                      |
| White/ White British                  | 370 (70.1)              | 1158 (75.4)                    | <0.001               |
| Black/ Black British                  | 43 (8.1)                | 148 (9.6)                      |                      |
| Asian/ Asian British                  | 67 (12.7)               | 60 (3.9)                       |                      |
| Mixed/ Multiple ethnicity             | 40 (7.6)                | 148 (9.6)                      |                      |
| Other                                 | 8 (1.5)                 | 21 (1.4)                       |                      |

Data are n (%)
