# Supplementary material for: Does internet-accessed STI (e-STI) testing increase testing uptake for chlamydia and other STIs among a young population who have never tested? Secondary analyses of data from a randomised controlled trial
Source: PubMed Central journal article supplement — Sex Transm Infect. 2019 Jun 7;95(8):569–74. doi: 10.1136/sextrans-2019-053992 (PMC6902059; doi:10.1136/sextrans-2019-053992), 2019-06-07
Supplement: sextrans-2019-053992supp003.pdf [file sextrans-2019-053992supp003.pdf]

**Table 2. Comparison of estimates from analyses using multiply imputed (MI) datasets and analyses in the complete cases**

| <b>Outcome</b>                                          | <b>Intervention</b>            | <b>Control</b>                 |                                | <b>Risk difference (95% CI)</b> | <b>Relative risk (95% CI)</b> | <b>P value</b>   |
|---------------------------------------------------------|--------------------------------|--------------------------------|--------------------------------|---------------------------------|-------------------------------|------------------|
| Completion of any STI test at 6 weeks                   | <b>45.3%</b><br><b>(n=244)</b> | <b>24.1%</b><br><b>(n=284)</b> | <b>Weighted MI</b>             | <b>21.2% (12.5, 29.8)</b>       | <b>1.88 (1.47, 2.40)</b>      | <b>&lt;0.001</b> |
|                                                         |                                |                                | Unweighted MI                  | 21.3% (12.5, 30.2)              | 1.89 (1.43, 2.52)             | <0.001           |
|                                                         | 44.1%<br>(94/213)              | 19.6%<br>(44/224)              | <i>Weighted Complete Cases</i> | <i>24.9% (16.7, 33.0)</i>       | <i>2.26 (1.59, 2.93)</i>      | <i>&lt;0.001</i> |
| Completion of chlamydia and gonorrhoea tests at 6 weeks | <b>44.3%</b><br><b>(n=244)</b> | <b>24.1%</b><br><b>(n=284)</b> | <b>Weighted MI</b>             | <b>20.2% (11.7, 28.8)</b>       | <b>1.84 (1.44, 2.36)</b>      | <b>&lt;0.001</b> |
|                                                         |                                |                                | Unweighted MI                  | 20.4% (11.6, 29.2)              | 1.85 (1.39, 2.46)             | <0.001           |
|                                                         | 43.2%<br>(92/213)              | 19.6%<br>(44/224)              | <i>Weighted Complete Cases</i> | <i>24.0% (15.9, 32.1)</i>       | <i>2.22 (1.56, 2.88)</i>      | <i>&lt;0.001</i> |
