# Supplementary material for: Does internet-accessed STI (e-STI) testing increase testing uptake for chlamydia and other STIs among a young population who have never tested? Secondary analyses of data from a randomised controlled trial
Source: PubMed Central journal article supplement — Sex Transm Infect. 2019 Jun 7;95(8):569–74. doi: 10.1136/sextrans-2019-053992 (PMC6902059; doi:10.1136/sextrans-2019-053992), 2019-06-07
Supplement: sextrans-2019-053992supp004.pdf [file sextrans-2019-053992supp004.pdf]

**Table3. Service used for testing, by arm**

|                                               | <b>Intervention<br/>n (%)</b> | <b>Control<br/>n (%)</b> |
|-----------------------------------------------|-------------------------------|--------------------------|
| Sexual health clinic in Lambeth and Southwark | 9 (9.6%)                      | 39 (88.6%)               |
| Other sexual health clinic                    | 1 (1.1%)                      | 1 (2.3%)                 |
| GP                                            | 0 (0%)                        | 1 (2.3%)                 |
| SH:24                                         | 84 (89.4%)                    | 3 (6.8%)                 |
| <i>Total who completed a test</i>             | <i>94 (100%)</i>              | <i>44 (100%)</i>         |
